# Supplementary material for: Towards effective lignin conversion: HZSM-5 catalyzed one-pot solvolytic depolymerization/hydrodeoxygenation of lignin into value added compounds
Source: Royal Society of Chemistry journal article supplement (doi:10.1039/c4ra02968b), 2014-01-01
Supplement: c4ra02968b1.pdf [file c4ra02968b1.pdf]

# Towards effective Lignin Conversion: HZSM-5 catalyzed one-pot solvolytic depolymerisation/hydrodeoxygenation of Lignin into Value added Hydrocarbons

Sunit K. Singh, and Jayant D. Ekhe\*

## Supporting Information

### Table of Contents

|                                                                                                             |     |
|-------------------------------------------------------------------------------------------------------------|-----|
| <b>Table S-1.</b> Calculated lattice parameters of HZSM-5.....                                              | S2  |
| <b>Figure S-1.</b> EDS Spectra of HZSM-5.....                                                               | S2  |
| <b>Table S-2.</b> Gravimetric analysis of the catalyst recovered after catalytic runs.....                  | S3  |
| <b>Table S-3.</b> FTIR bands assignment in lignin.....                                                      | S3  |
| <b>Figure S-2.</b> Total ion chromatogram of Water soluble products of reaction with no solid catalyst..... | S4  |
| <b>Figure S-3.</b> Total ion chromatogram of EtOAc soluble products of reaction with no solid catalyst..... | S4  |
| <b>Figure S-4.</b> Total ion chromatogram of water soluble products of reaction with HZSM-5.....            | S5  |
| <b>Figure S-5.</b> Total ion chromatogram of EtOAc soluble products of reaction with HZSM-5.....            | S5  |
| <b>Figure S-6.</b> ESI-MS spectra of lignin conversion products of reaction with HZSM-5.....                | S6  |
| <b>Figure S-7.</b> XRD spectra of H-ZSM-5 after and before reaction.....                                    | S6  |
| <b>Figure S-8.</b> XRD spectra of Ni-ZSM-5 after and before reaction.....                                   | S7  |
| <b>Table S-4.</b> Compounds identified in EtOAc soluble products of reaction with HZSM-5.....               | S8  |
| <b>Table S-5.</b> Compounds identified in EtOAc soluble product of reaction with Ni-ZSM-5.....              | S9  |
| <b>Table S-6.</b> Compounds identified in Water soluble product of reaction with HZSM-5.....                | S10 |
| <b>Table S-7.</b> Compounds identified in Water soluble product of reaction with Ni-ZSM-5.....              | S11 |

**Table S-1** Calculated lattice parameters of HZSM-5.

| HZSM-5<br>(ICDD <sup>a</sup> ref. code 00-044-0003) |         | HZSM-5<br>(synthesised)                           |         | NiO<br>(ICDD <sup>a</sup> ref. code 01-073-1523)  |         | NiO<br>impregnated on<br>HZSM-5                   |         |
|-----------------------------------------------------|---------|---------------------------------------------------|---------|---------------------------------------------------|---------|---------------------------------------------------|---------|
| Parameter                                           | Value   | Parameter                                         | Value   | Parameter                                         | Value   | Parameter                                         | Value   |
| a (Å)                                               | 20.104  | a (Å)                                             | 20.094  | a (Å)                                             | 4.1800  | a (Å)                                             | 4.18349 |
| b (Å)                                               | 19.897  | b (Å)                                             | 19.891  | a (Å)                                             | 4.1800  | a (Å)                                             | 4.18349 |
| c (Å)                                               | 13.395  | c (Å)                                             | 13.393  | a (Å)                                             | 4.1800  | a (Å)                                             | 4.18349 |
| Cell volume<br>(10 <sup>6</sup> pm <sup>3</sup> )   | 5358.12 | Cell volume<br>(10 <sup>6</sup> pm <sup>3</sup> ) | 5353.61 | Cell volume<br>(10 <sup>6</sup> pm <sup>3</sup> ) | 73.0300 | Cell volume<br>(10 <sup>6</sup> pm <sup>3</sup> ) | 73.2175 |

<sup>a</sup> ICDD-International Centre of Diffraction Data

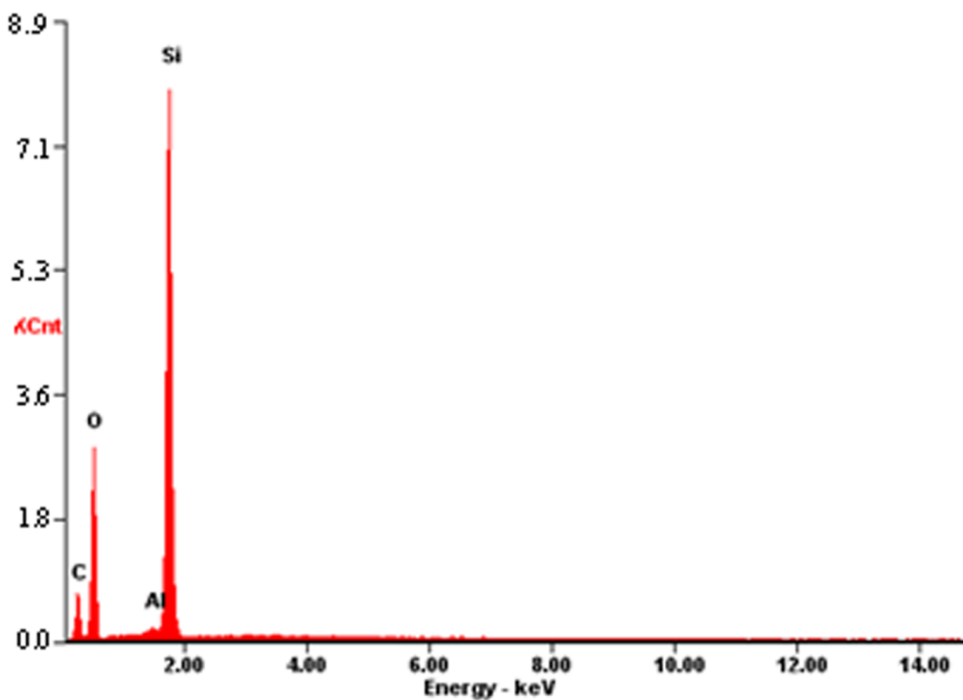

**Figure S-1.** EDS Spectra of HZSM-5

**Table S-2** Gravimetric analysis of the catalyst recovered after catalytic runs (7 hr at 493 K) using 0.1 g of lignin, 1.7 mmol NaOH and 0.1 g of Ni-ZSM-5 catalyst in 10 mL of CH<sub>3</sub>OH and 10 ml Water.<sup>a</sup>

| <b>Runs</b> | <b>Catalyst recovered (mg)</b> | <b>Deviation</b> |
|-------------|--------------------------------|------------------|
| <b>1</b>    | 99.8                           | -0.8             |
| <b>2</b>    | 100.9                          | 0.3              |
| <b>3</b>    | 100.5                          | -0.1             |
| <b>4</b>    | 101.2                          | 0.6              |
| <b>Avg.</b> | 100.6                          | ±0.45            |

<sup>a</sup>Few separate runs were conducted with 0.1 g lignin and 0.1 g Ni-ZSM-5 for 7 Hr. After the described solvent work-ups, the THF insoluble fraction was thoroughly washed with THF and dried in oven at 323 K for 6 hrs and measured gravimetrically. Results are shown in table S2, very little char (<1%), if any, was formed in the reaction with Solid catalyst. While without Solid catalyst and NaOH up to 40 % char was obtained.

**Table S-3** FTIR bands assignment in lignin.

| <b>Wavenumber (cm<sup>-1</sup>)</b> | <b>Band origin</b>                                                                            |
|-------------------------------------|-----------------------------------------------------------------------------------------------|
| 3400- 3600                          | Hydroxyl groups in phenolic and aliphatic structures                                          |
| 3000-3200                           | Aromatic C H stretching                                                                       |
| 2880-2968                           | C H stretching in aromatic methoxyl groups and in methyl and methylene groups of side chains. |
| 1720-1705                           | unconjugated carbonyl/carboxyl stretching                                                     |
| 1600, 1515 and 1426                 | Aromatic skeleton vibrations                                                                  |
| 1460-1470                           | C H deformation; asym. in CH <sub>3</sub> and CH <sub>2</sub>                                 |
| 1365-1370                           | Aliphatic C H stretch in CH <sub>3</sub> , not in OCH <sub>3</sub>                            |
| 1325-1330                           | S ring plus G ring condensed                                                                  |
| 1266-1270                           | G ring plus C=O stretch                                                                       |
| 1215-1220                           | C-C plus C-O plus C=O stretching                                                              |
| 1115                                | C-O-C linkages                                                                                |
| 1035                                | Aromatic in plane C-H deformation                                                             |
| 855-865                             | aromatic out of plane C-H deformation                                                         |

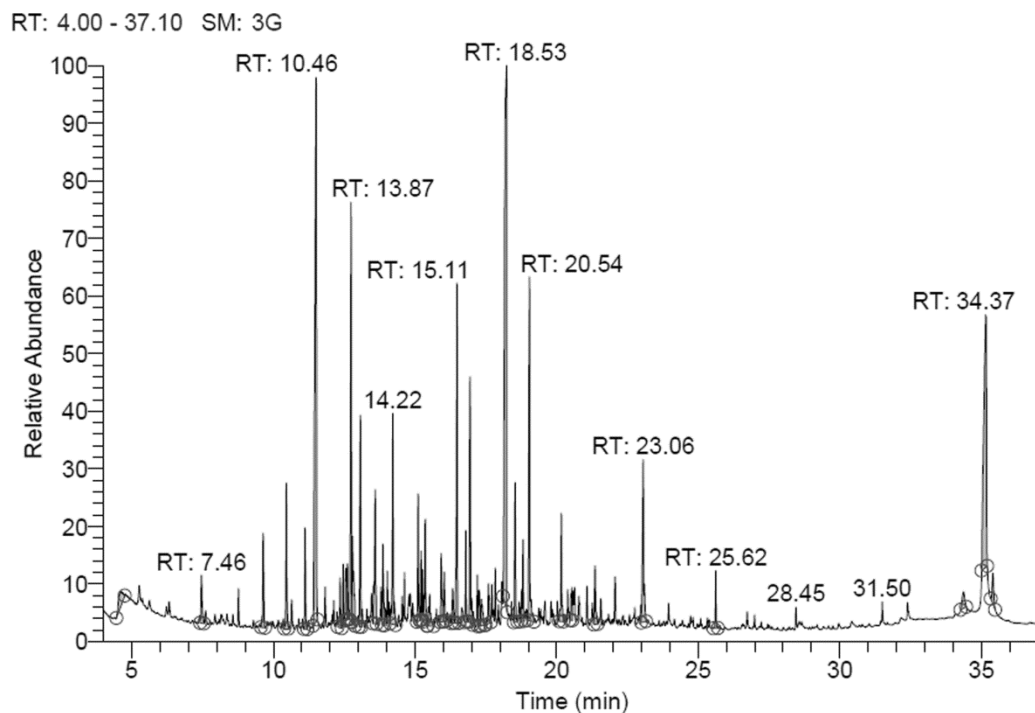

**Figure S-2.** Total ion chromatogram of Water soluble products of reaction with no solid catalyst.

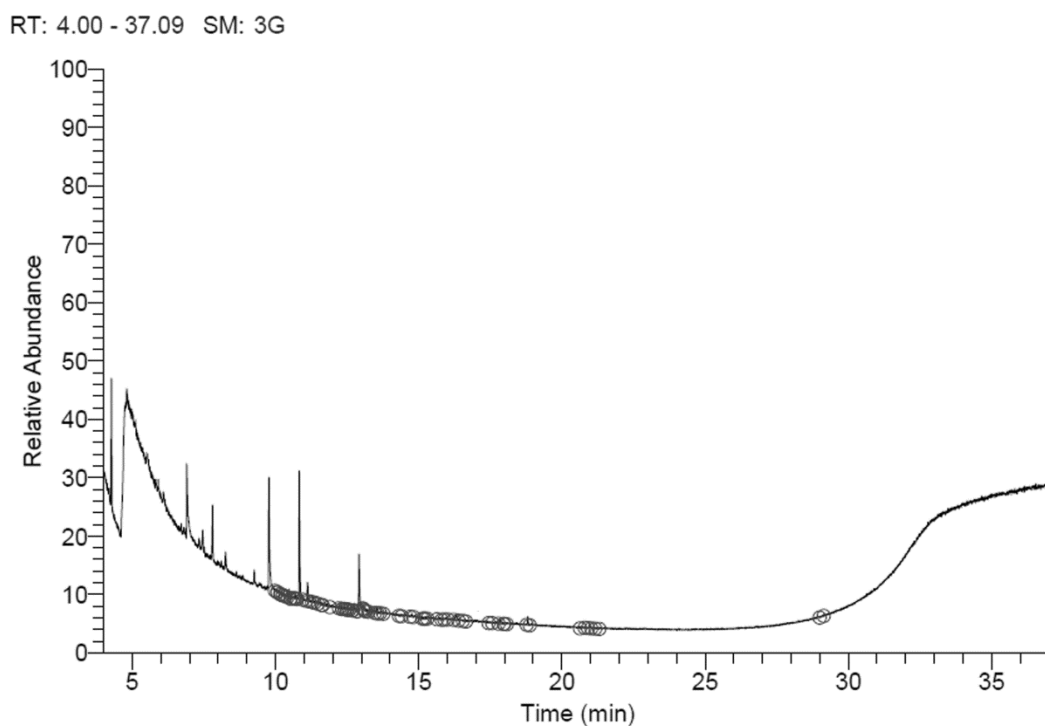

**Figure S-3.** Total ion chromatogram of EtOAc soluble products of reaction with no solid catalyst.

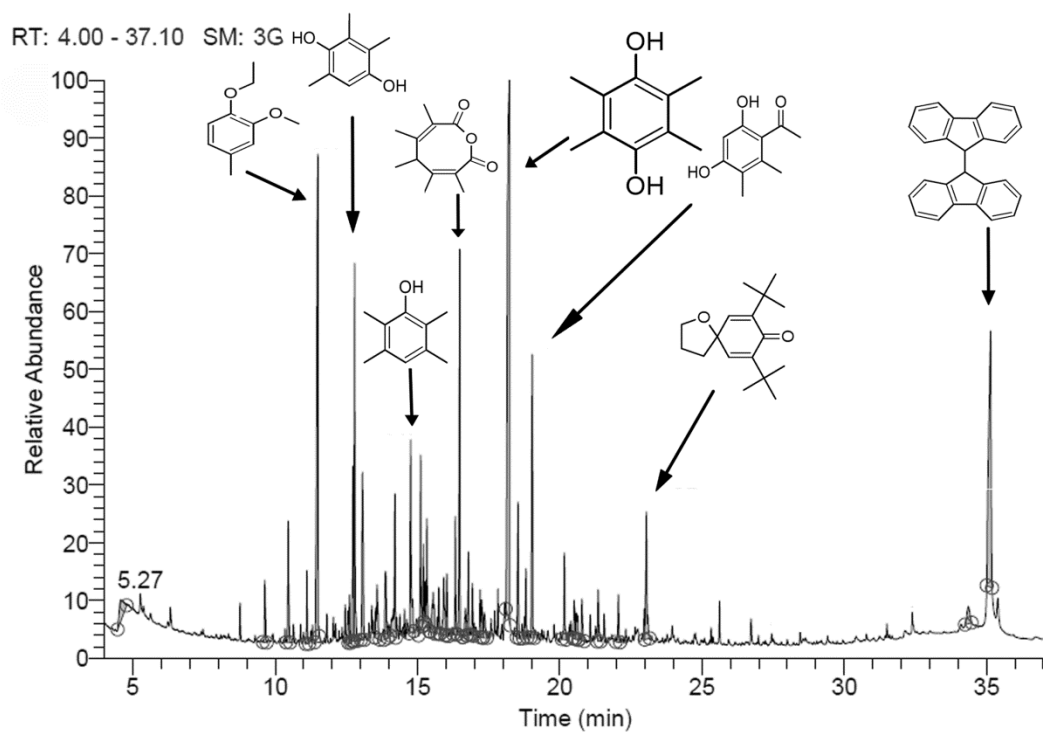

**Figure S-4.** Total ion chromatogram of water soluble products of reaction with HZSM-5.

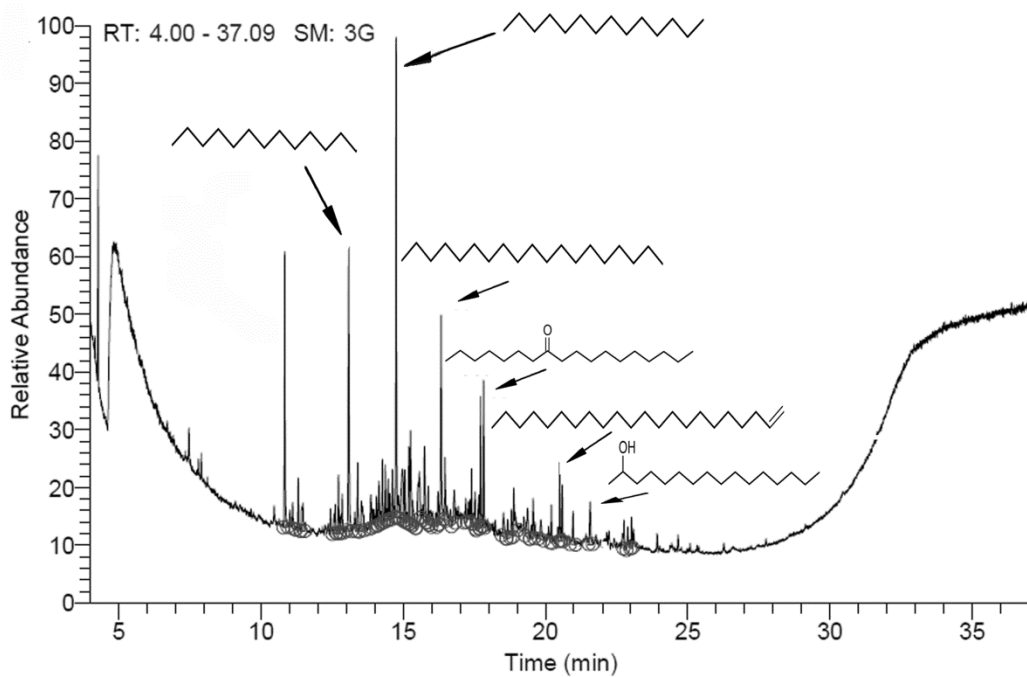

**Figure S-5.** Total ion chromatogram of EtOAc soluble products of reaction with HZSM-5.

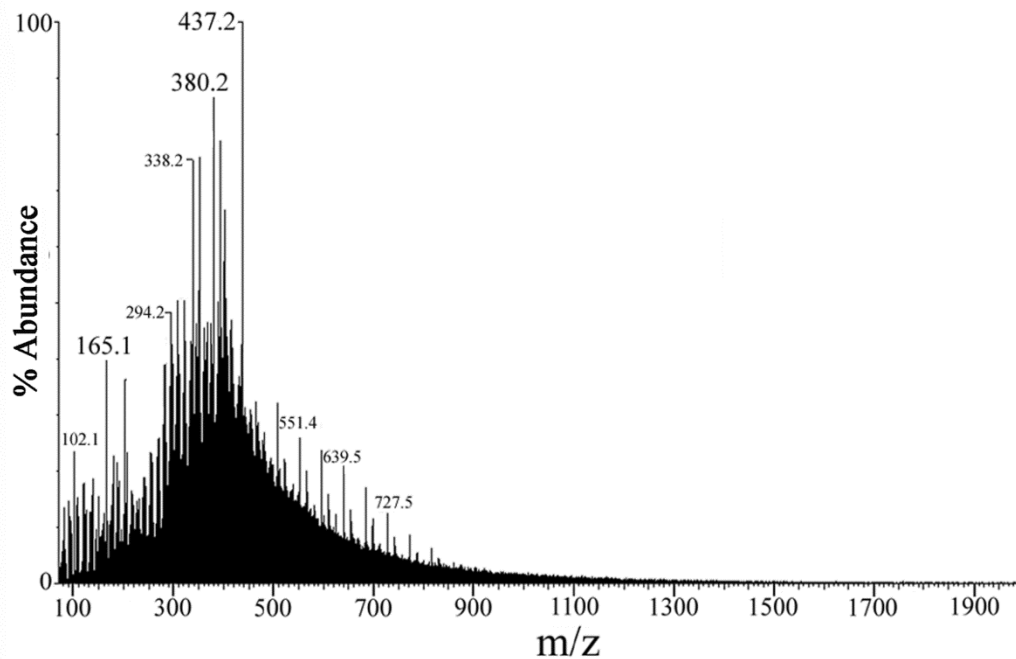

Figure S-6. ESI-MS spectra of lignin conversion products of reaction with HZSM-5.

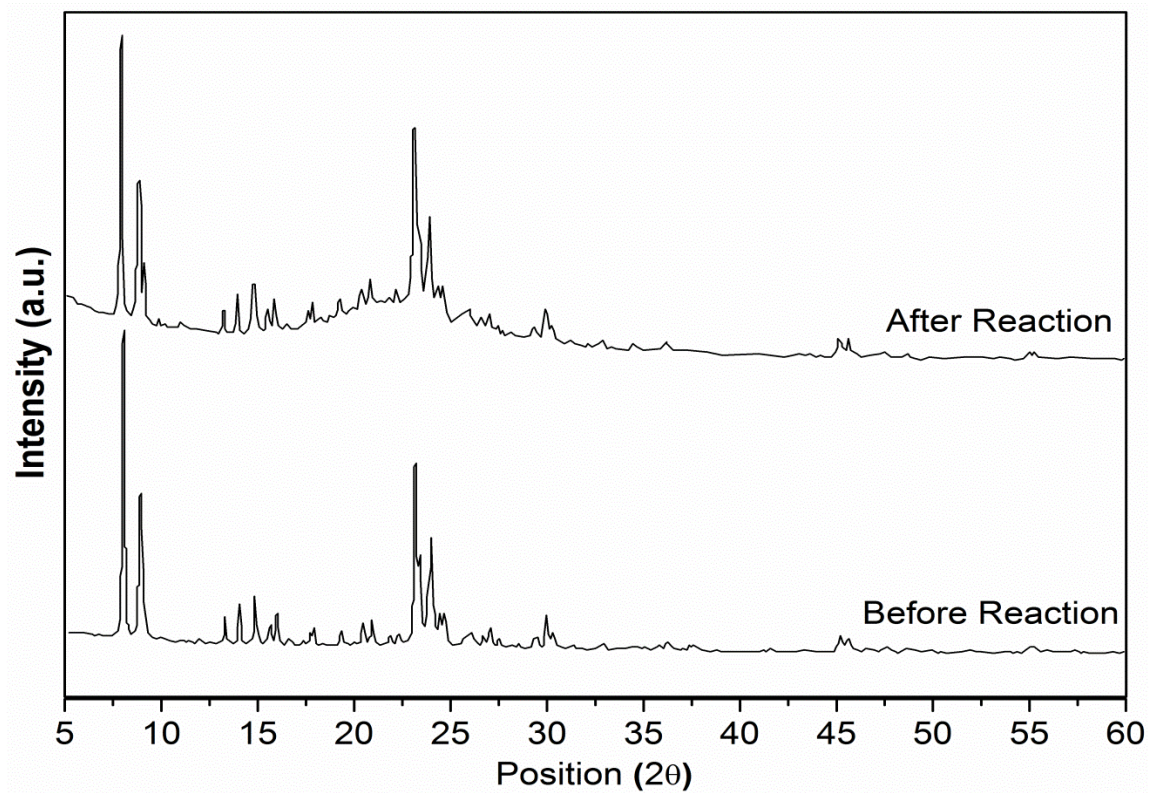

Figure S-7. XRD spectra of HZSM-5 after and before reaction.

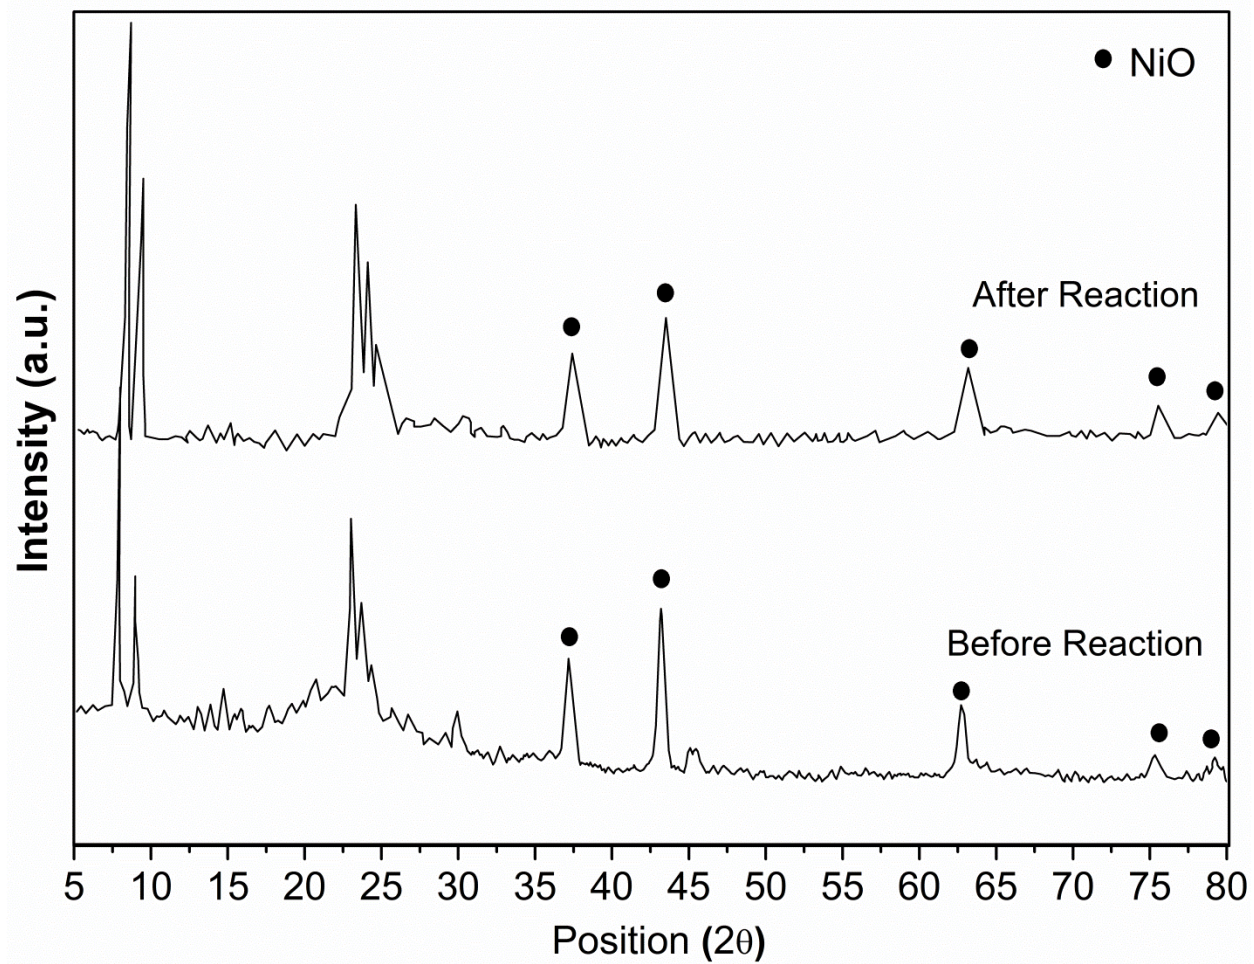

**Figure S-8.** XRD spectra of Ni-ZSM-5 after and before reaction.



Table S-4 Compound identified in EtOAc soluble products of reaction with HZSM-5.

| RT            | Compound Name                                                                                           | Molecular Formula                                               | Molecular Weight | Area %       |
|---------------|---------------------------------------------------------------------------------------------------------|-----------------------------------------------------------------|------------------|--------------|
| 11.12         | 2-Naphthalenol, 1,2-dihydro-,acetate                                                                    | C <sub>12</sub> H <sub>12</sub> O <sub>2</sub>                  | 188              | 0.78         |
| <b>11.31*</b> | <b>Dodecane</b>                                                                                         | <b>C<sub>12</sub>H<sub>26</sub></b>                             | <b>170</b>       | <b>1.34</b>  |
| 11.47         | à-Irone                                                                                                 | C <sub>14</sub> H <sub>22</sub> O                               | 206              | 1.48         |
| 12.61**       | <b>Cyclopropanetetradecanoic acid,2-octyl-, methyl ester</b>                                            | <b>C<sub>26</sub>H<sub>50</sub>O<sub>2</sub></b>                | <b>394</b>       | <b>4.75</b>  |
| 12.72         | 2-Cyclopenten-1-one, 2-(2-butenyl)-4-hydroxy-3-methyl,(Z)                                               | C <sub>10</sub> H <sub>14</sub> O <sub>2</sub>                  | 166              | 1.46         |
| 13.53         | <b>2-hydroxy-6-hexadecenoic acid, methyl ester</b>                                                      | <b>C<sub>17</sub>H<sub>41</sub>O<sub>3</sub></b>                | <b>356</b>       | <b>1.91</b>  |
| 13.86         | Trans-Z-à-Bisabolene epoxide                                                                            | C <sub>15</sub> H <sub>24</sub> O                               | 220              | 1.11         |
| 14.27         | <b>1-Hexadecanol, 2-methyl-</b>                                                                         | <b>C<sub>17</sub>H<sub>36</sub>O</b>                            | <b>256</b>       | <b>1.67</b>  |
| <b>14.38</b>  | <b>Dodecane, 2,6,10-trimethyl-</b>                                                                      | <b>C<sub>15</sub>H<sub>32</sub></b>                             | <b>212</b>       | <b>1.47</b>  |
| 14.48         | à-acorenol                                                                                              | C <sub>15</sub> H <sub>26</sub> O                               | 222              | 0.90         |
| <b>14.75</b>  | <b>Tetradecane</b>                                                                                      | <b>C<sub>14</sub>H<sub>30</sub></b>                             | <b>198</b>       | <b>19.04</b> |
| 15.06         | <b>5-Isopropylidene-6-methyl deca-3,6,9-trien-2-one</b>                                                 | <b>C<sub>14</sub>H<sub>20</sub>O</b>                            | <b>204</b>       | <b>1.33</b>  |
| 15.26         | Naphthalene, 1,7-dimethyl-                                                                              | C <sub>12</sub> H <sub>12</sub>                                 | 156              | 5.10         |
| 15.33         | 2H-Cyclohepta[b]furan-2-one, 6-[1-(acetyloxy)-3-oxobutyl]-3,3a, 4,7,8,8a-hexahydro-7-methyl-3-methylene | C <sub>17</sub> H <sub>22</sub> O <sub>5</sub>                  | 306              | 1.26         |
| <b>15.75</b>  | <b>Tetradecane, 2,6,10-trimethyl-</b>                                                                   | <b>C<sub>17</sub>H<sub>36</sub></b>                             | <b>240</b>       | <b>3.94</b>  |
| 15.96         | Cyclohexane,1,1,3-trimethyl-2,3-epoxy-2(3-methylcyclobuten-2-yl)-4-acetyloxy-                           | C <sub>16</sub> H <sub>24</sub> O <sub>3</sub>                  | 264              | 0.76         |
| <b>16.33</b>  | <b>Hexadecane</b>                                                                                       | <b>C<sub>16</sub>H<sub>34</sub></b>                             | <b>226</b>       | <b>5.58</b>  |
| 16.47         | 3-tert-Butyl-4-hydroxyanisole                                                                           | C <sub>11</sub> H <sub>16</sub> O <sub>2</sub>                  | 180              | 1.65         |
| 17.40         | <b>1-Dodecanol,3,7,11-trimethyl-</b>                                                                    | <b>C<sub>15</sub>H<sub>32</sub>O</b>                            | <b>228</b>       | <b>3.48</b>  |
| 17.52         | 2-Butenal, 2-methyl-4-(2,6,6-trimethyl-1-cyclohexen-1-yl)-                                              | C <sub>14</sub> H <sub>22</sub> O                               | 206              | 1.19         |
| 17.72         | <b>1-Hexadecanol, acetate</b>                                                                           | <b>C<sub>18</sub>H<sub>36</sub>O<sub>2</sub></b>                | <b>284</b>       | <b>8.89</b>  |
| <b>17.83</b>  | <b>Nonadecane</b>                                                                                       | <b>C<sub>19</sub>H<sub>40</sub></b>                             | <b>268</b>       | <b>3.17</b>  |
| 18.52         | Xanthatin,1'-acetoxy-3-methyl-3-demethylene-1',2'-dihydro-                                              | C <sub>17</sub> H <sub>24</sub> O <sub>5</sub>                  | 308              | 1.18         |
| 18.89         | <b>8-Octadecanone</b>                                                                                   | <b>C<sub>18</sub>H<sub>36</sub>O</b>                            | <b>268</b>       | <b>2.04</b>  |
| <b>20.21</b>  | <b>Heptadecane, 3methyl-</b>                                                                            | <b>C<sub>18</sub>H<sub>38</sub></b>                             | <b>254</b>       | <b>0.90</b>  |
| <b>20.50</b>  | <b>1-Docosene</b>                                                                                       | <b>C<sub>22</sub>H<sub>44</sub></b>                             | <b>308</b>       | <b>1.74</b>  |
| <b>20.59</b>  | <b>Heptacosane</b>                                                                                      | <b>C<sub>27</sub>H<sub>56</sub></b>                             | <b>380</b>       | <b>2.04</b>  |
| 21.57         | 2-Myristynoyl pantetheine                                                                               | C <sub>25</sub> H <sub>44</sub> N <sub>2</sub> O <sub>5</sub> S | 484              | 1.55         |
| 23.03         | <b>2-Hexadecanol</b>                                                                                    | <b>C<sub>16</sub>H<sub>34</sub>O</b>                            | <b>242</b>       | <b>4.73</b>  |

\* Acyclic deoxygenated hydrocarbons (marked in bold red), \*\* Acyclic Oxygenated hydrocarbons (marked in bold blue)



Table S-5 Compound identified in EtOAc soluble product of reaction with Ni-ZSM-5.

| RT            | Compound Name                                                                                                              | Molecular Formula                                | Molecular Weight | Area %       |
|---------------|----------------------------------------------------------------------------------------------------------------------------|--------------------------------------------------|------------------|--------------|
| 11.11         | 2-Naphthalenol, 1,2-dihydro-,acetate                                                                                       | C <sub>12</sub> H <sub>12</sub> O <sub>2</sub>   | 188              | 1.03         |
| <b>11.31*</b> | <b>Decane, 4-methyl-</b>                                                                                                   | <b>C<sub>11</sub>H<sub>24</sub></b>              | <b>156</b>       | <b>2.93</b>  |
| 11.47         | à-Irone                                                                                                                    | C <sub>14</sub> H <sub>22</sub> O                | 206              | 1.64         |
| 12.73         | 2-Cyclopenten-1-one, 2-(2-butenyl)-4-hydroxy-3-methyl, (Z)                                                                 | C <sub>10</sub> H <sub>14</sub> O <sub>2</sub>   | 166              | 1.23         |
| 14.07**       | <b>Methoxyacetic acid, 2-tridecyl ester</b>                                                                                | <b>C<sub>16</sub>H<sub>32</sub>O<sub>3</sub></b> | <b>272</b>       | <b>0.88</b>  |
| <b>14.15</b>  | <b>Tetradecane, 2,6,10-trimethyl-</b>                                                                                      | <b>C<sub>17</sub>H<sub>36</sub></b>              | <b>240</b>       | <b>3.54</b>  |
| <b>14.27</b>  | <b>1-Hexadecanol, 2-methyl-</b>                                                                                            | <b>C<sub>17</sub>H<sub>36</sub>O</b>             | <b>256</b>       | <b>5.48</b>  |
| <b>14.37</b>  | <b>Dodecane, 2,6,10-trimethyl-</b>                                                                                         | <b>C<sub>15</sub>H<sub>32</sub></b>              | <b>212</b>       | <b>1.74</b>  |
| 14.47         | à-acorenol                                                                                                                 | C <sub>15</sub> H <sub>26</sub> O                | 222              | 0.95         |
| 14.53         | Benzene, (2,4-cyclopentadien-1-ylidenemethyl-)                                                                             | C <sub>12</sub> H <sub>10</sub>                  | 154              | 0.75         |
| <b>14.75</b>  | <b>Tetradecane</b>                                                                                                         | <b>C<sub>14</sub>H<sub>30</sub></b>              | <b>198</b>       | <b>20.64</b> |
| 15.06         | 1H-Benzocycloheptene, 2,4a,5,6,7,8,9,9a-octahydro-3,5,5-trimethyl-9-methylene,(4aScis)                                     | C <sub>15</sub> H <sub>24</sub>                  | 204              | 1.14         |
| 15.26         | Naphthalene, 1,7-dimethyl-                                                                                                 | C <sub>12</sub> H <sub>12</sub>                  | 156              | 4.17         |
| 15.55         | <b>9,12,15-Octadecatrienoic acid,2-(acetyloxy)-1-[(acetyloxy)methyl]ethyl ester, (Z,Z,Z)</b>                               | <b>C<sub>25</sub>H<sub>40</sub>O<sub>6</sub></b> | <b>436</b>       | <b>3.27</b>  |
| <b>15.75</b>  | <b>Heptadecane, 2,6,10,14-tetramethyl-</b>                                                                                 | <b>C<sub>21</sub>H<sub>44</sub></b>              | <b>296</b>       | <b>2.51</b>  |
| <b>16.33</b>  | <b>Nonadecane</b>                                                                                                          | <b>C<sub>19</sub>H<sub>40</sub></b>              | <b>268</b>       | <b>6.56</b>  |
| 16.47         | 3-tert-Butyl-4-hydroxyanisole                                                                                              | C <sub>11</sub> H <sub>16</sub> O <sub>2</sub>   | 180              | 1.63         |
| 17.34         | <b>Cyclopropanetetradecanoic acid, 2-octyl-, methyl ester</b>                                                              | <b>C<sub>26</sub>H<sub>50</sub>O<sub>2</sub></b> | <b>394</b>       | <b>7.44</b>  |
| 17.40         | <b>2-Hexadecanol</b>                                                                                                       | <b>C<sub>16</sub>H<sub>34</sub>O</b>             | <b>242</b>       | <b>4.87</b>  |
| 17.52         | Naphtho-[2,3b]-furan-2-(3H)-one,-4-(acetyloxy)decahydro-8-hydroxy-3,8a-dimethyl-5-methylene,[3R(3à,3aà,4à,4aà,8à,8aá,9aá)] | C <sub>17</sub> H <sub>24</sub> O <sub>5</sub>   | 308              | 1.11         |
| 17.66         | <b>1-Hexadecanol, acetate</b>                                                                                              | <b>C<sub>18</sub>H<sub>36</sub>O<sub>2</sub></b> | <b>284</b>       | <b>3.61</b>  |
| 17.72         | <b>Acetic acid, n-octadecyl ester</b>                                                                                      | <b>C<sub>20</sub>H<sub>40</sub>O<sub>2</sub></b> | <b>312</b>       | <b>2.50</b>  |
| 18.52         | 2H-Cyclohepta-[b]-furan-2-one, 6-[1-(acetyloxy)-3-oxobutyl]-3,3a,4,7,8,8a-hexahydro-7-methyl-3-methylene                   | C <sub>17</sub> H <sub>22</sub> O <sub>5</sub>   | 306              | 1.10         |
| 18.89         | <b>8-Octadecanone</b>                                                                                                      | <b>C<sub>18</sub>H<sub>36</sub>O</b>             | <b>268</b>       | <b>2.13</b>  |
| <b>20.21</b>  | <b>Heptadecane, 2,3dimethyl-</b>                                                                                           | <b>C<sub>19</sub>H<sub>40</sub></b>              | <b>268</b>       | <b>1.15</b>  |
| <b>20.50</b>  | <b>1-Docosene</b>                                                                                                          | <b>C<sub>22</sub>H<sub>44</sub></b>              | <b>308</b>       | <b>1.35</b>  |
| <b>20.59</b>  | <b>Octadecane</b>                                                                                                          | <b>C<sub>18</sub>H<sub>38</sub></b>              | <b>254</b>       | <b>1.69</b>  |
| <b>22.76</b>  | <b>Nonadecane, 2,3-dimethyl-</b>                                                                                           | <b>C<sub>21</sub>H<sub>44</sub></b>              | <b>296</b>       | <b>1.02</b>  |

\* Acyclic deoxygenated hydrocarbons (marked in bold red), \*\* Acyclic Oxygenated hydrocarbons (marked in bold blue)

**Table S6** Compound identified in water soluble product of reaction with HZSM-5.

| RT    | Compound Name                                                                   | Molecular Formula                               | Molecular Weight | Area % |
|-------|---------------------------------------------------------------------------------|-------------------------------------------------|------------------|--------|
| 9.64  | 2-Cyclopenten-1-one,<br>2,3,4,5-tetramethyl-                                    | C <sub>9</sub> H <sub>14</sub> O                | 138              | 0.90   |
| 10.46 | 1,4-Benzenediol,<br>2,5-dimethyl-                                               | C <sub>8</sub> H <sub>10</sub> O <sub>2</sub>   | 138              | 1.93   |
| 11.12 | 1-Cyclohexene-1-carboxaldehyde, 2,6,6-trimethyl-                                | C <sub>10</sub> H <sub>16</sub> O               | 152              | 0.93   |
| 11.50 | Phenol, 2,4,6-trimethyl-                                                        | C <sub>9</sub> H <sub>12</sub> O                | 136              | 10.37  |
| 12.62 | 2-Cyclopenten-1-one,<br>2-(2-butenyl)-<br>4-hydroxy-3-methyl-, (Z)              | C <sub>10</sub> H <sub>14</sub> O <sub>2</sub>  | 166              | 0.77   |
| 12.74 | Benzene,<br>1-ethoxy-2-methoxy-4-methyl-                                        | C <sub>10</sub> H <sub>14</sub> O <sub>2</sub>  | 166              | 2.08   |
| 12.80 | 1,4-Benzenediol, 2,3,5-trimethyl-                                               | C <sub>9</sub> H <sub>12</sub> O <sub>2</sub>   | 152              | 5.17   |
| 13.07 | Phenol, 2-ethyl-4,5-dimethyl-                                                   | C <sub>10</sub> H <sub>14</sub> O               | 150              | 3.08   |
| 13.58 | 2(3H)-Naphthalenone,<br>4,4a,5,6,7,8-hexahydro-1-methoxy-                       | C <sub>11</sub> H <sub>16</sub> O <sub>2</sub>  | 180              | 1.41   |
| 13.87 | Phenol,<br>3-methoxy-2,5,6-trimethyl-                                           | C <sub>10</sub> H <sub>14</sub> O <sub>2</sub>  | 166              | 1.57   |
| 14.21 | Phenol, 2,3,5,6-tetramethyl-                                                    | C <sub>10</sub> H <sub>14</sub> O               | 150              | 2.59   |
| 15.11 | 2,5-Heptadienoic anhydride,<br>2,3,4,5,6-pentamethyl, Z,Z-                      | C <sub>12</sub> H <sub>16</sub> O <sub>3</sub>  | 208              | 2.47   |
| 15.21 | 3-Buten-2-one, 3-methyl-4-(<br>1,3,3-trimethyl-7-oxabicyclo[4.1.0]heptan-1-yl)- | C <sub>14</sub> H <sub>22</sub> O <sub>2</sub>  | 222              | 0.98   |
| 15.33 | Phenol,<br>5-methoxy-2,3,4-trimethyl-                                           | C <sub>10</sub> H <sub>14</sub> O <sub>2</sub>  | 166              | 1.58   |
| 15.55 | 1,4-Benzenediol,<br>2,3,5-trimethyl-                                            | C <sub>9</sub> H <sub>12</sub> O <sub>2</sub>   | 152              | 1.36   |
| 15.76 | 2-Oxabicyclo[3.3.0]oct-7-en-3-one, 7-(1-hydroxypentyl)-                         | C <sub>12</sub> H <sub>18</sub> O <sub>3</sub>  | 210              | 0.70   |
| 15.93 | 5,6,7,8-Tetramethylbicyclo[<br>4.1.0]Hept-4-en-3-one                            | C <sub>11</sub> H <sub>16</sub> O               | 164              | 1.53   |
| 16.03 | Carbofurane                                                                     | C <sub>12</sub> H <sub>15</sub> NO <sub>3</sub> | 221              | 0.99   |
| 16.49 | Phenol,<br>3-(1,1-dimethylethyl)-4-methoxy-                                     | C <sub>11</sub> H <sub>16</sub> O <sub>2</sub>  | 180              | 5.53   |
| 16.69 | Phenol, 5-methoxy-2,3-dimethyl-                                                 | C <sub>9</sub> H <sub>12</sub> O <sub>2</sub>   | 152              | 0.69   |
| 16.79 | Phenol,<br>4-methoxy-2,3,6-trimethyl-                                           | C <sub>10</sub> H <sub>14</sub> O <sub>2</sub>  | 166              | 1.22   |
| 16.94 | Phenol,<br>2-(1,1-dimethylethyl)-3-methyl-                                      | C <sub>11</sub> H <sub>16</sub> O               | 164              | 0.68   |
| 17.26 | àTetralol,<br>2-amino-5,6-dimethoxy-                                            | C <sub>12</sub> H <sub>17</sub> NO <sub>3</sub> | 223              | 0.74   |
| 17.34 | Benzene,                                                                        | C <sub>12</sub> H <sub>18</sub> O <sub>2</sub>  | 194              | 0.65   |

|       |                                                                                |                                                |     |       |
|-------|--------------------------------------------------------------------------------|------------------------------------------------|-----|-------|
|       | 1,4-dimethoxy-2,3,5,6-tetramethyl-                                             |                                                |     |       |
| 18.24 | Durohydroquinone                                                               | C <sub>10</sub> H <sub>14</sub> O <sub>2</sub> | 166 | 19.05 |
| 18.53 | Phenol,<br>2-methoxy-4-methyl-6-[propenyl]-                                    | C <sub>11</sub> H <sub>14</sub> O <sub>2</sub> | 178 | 1.86  |
| 18.81 | Phenol,<br>3-(1,1-dimethylethyl)-4-methoxy-                                    | C <sub>11</sub> H <sub>16</sub> O <sub>2</sub> | 180 | 1.08  |
| 19.03 | 4',6'-Dihydroxy-<br>2',3'-dimethylacetophenone                                 | C <sub>10</sub> H <sub>12</sub> O <sub>3</sub> | 180 | 4.11  |
| 20.17 | 2-Hydroxy-4,5-methylene<br>dioxypropiofenone                                   | C <sub>10</sub> H <sub>10</sub> O <sub>4</sub> | 194 | 1.28  |
| 20.51 | 3-Ethyl-4,4-dimethyl-<br>2-(2-methylpropenyl)<br>cyclohex-2-enone              | C <sub>14</sub> H <sub>22</sub> O              | 206 | 0.75  |
| 20.59 | 4(3,3-Dimethylbut-1-ynyl)<br>4-hydroxy-2,6,6-trimethylcyclohex-2-enone         | C <sub>15</sub> H <sub>22</sub> O <sub>2</sub> | 234 | 0.68  |
| 20.78 | 4,7-Dimethoxy-2-methyl<br>indan-1-one                                          | C <sub>12</sub> H <sub>14</sub> O <sub>3</sub> | 206 | 0.73  |
| 21.35 | Phenol, 2,5-bis(<br>1,1-dimethylethyl)-                                        | C <sub>14</sub> H <sub>22</sub> O              | 206 | 0.79  |
| 22.06 | Trimethyl-3,4-methylene<br>dioxychromane                                       | C <sub>13</sub> H <sub>16</sub> O <sub>3</sub> | 220 | 0.69  |
| 23.05 | 7,9-Ditert-butyl-1-oxaspiro-[<br>4,5]-deca-6,9-dien-8-one                      | C <sub>17</sub> H <sub>26</sub> O <sub>2</sub> | 262 | 2.41  |
| 34.36 | 9H-Xanthene-1,4-(<br>4ah,9ah)-dione,-7-hydroxy-2,3,4a,5,6,8,9a-<br>heptamethyl | C <sub>20</sub> H <sub>24</sub> O <sub>4</sub> | 328 | 0.81  |
| 35.15 | 9,9'-Bi-9H-fluorene                                                            | C <sub>26</sub> H <sub>18</sub>                | 330 | 9.75  |

**Table S7** Compound identified in water soluble product of reaction with Ni-ZSM-5

| RT    | Compound Name                                                 | Molecular Formula                              | Molecular Weight | Area % |
|-------|---------------------------------------------------------------|------------------------------------------------|------------------|--------|
| 9.64  | 2-Cyclopenten-1-one,<br>2,3,4,5-tetramethyl                   | C <sub>9</sub> H <sub>14</sub> O               | 138              | 0.87   |
| 10.46 | 1,4-Benzenediol,<br>2,5-dimethyl-                             | C <sub>8</sub> H <sub>10</sub> O <sub>2</sub>  | 138              | 1.81   |
| 11.12 | 1-Cyclohexene-1-carboxaldehyde,<br>2,6,6-trimethyl-           | C <sub>10</sub> H <sub>16</sub> O              | 152              | 0.82   |
| 11.50 | Phenol, 2,3,5-trimethyl-                                      | C <sub>9</sub> H <sub>12</sub> O               | 136              | 10.84  |
| 12.62 | 2-Cyclopenten-1-one, 2-(2-butenyl)4-hydroxy-<br>3-methyl,(Z)- | C <sub>10</sub> H <sub>14</sub> O <sub>2</sub> | 166              | 0.74   |
| 12.74 | Benzene,<br>1-ethoxy-2-methoxy-4-methyl-                      | C <sub>10</sub> H <sub>14</sub> O <sub>2</sub> | 166              | 2.22   |
| 12.80 | 3,4-Dimethoxytoluene                                          | C <sub>9</sub> H <sub>12</sub> O <sub>2</sub>  | 152              | 4.99   |
| 13.07 | Phenol, 2-ethyl-4,5-dimethyl-                                 | C <sub>10</sub> H <sub>14</sub> O              | 150              | 2.56   |

|       |                                                                                 |                                                 |     |       |
|-------|---------------------------------------------------------------------------------|-------------------------------------------------|-----|-------|
| 13.59 | 3-Acetyl-2,4,4-trimethyl<br>cyclohex-2-en-1-one                                 | C <sub>11</sub> H <sub>16</sub> O <sub>2</sub>  | 180 | 1.07  |
| 13.88 | Phenol,<br>3-methoxy-2,5,6-trimethyl-                                           | C <sub>10</sub> H <sub>14</sub> O <sub>2</sub>  | 166 | 1.42  |
| 14.12 | Phenol,<br>3-methoxy-2,5,6-trimethyl-                                           | C <sub>10</sub> H <sub>14</sub> O <sub>2</sub>  | 166 | 0.62  |
| 14.21 | Phenol, 2,3,5,6-tetramethyl-                                                    | C <sub>10</sub> H <sub>14</sub> O               | 150 | 1.68  |
| 15.11 | 2,5-Heptadienoic anhydride,<br>2,3,4,5,6-pentamethyl, Z,Z                       | C <sub>12</sub> H <sub>16</sub> O <sub>3</sub>  | 208 | 0.96  |
| 15.21 | 6-(3-Hydroxybut-1-enyl)<br>1,5,5-trimethyl-7-oxabicyclo<br>-[4.1.0]-heptan-2-ol | C <sub>13</sub> H <sub>22</sub> O <sub>3</sub>  | 226 | 0.64  |
| 15.33 | Phenol,<br>3-methoxy-2,5,6-trimethyl-                                           | C <sub>10</sub> H <sub>14</sub> O <sub>2</sub>  | 166 | 1.38  |
| 15.56 | 1,4-Benzenediol,<br>2,3,5-trimethyl-                                            | C <sub>9</sub> H <sub>12</sub> O <sub>2</sub>   | 152 | 1.32  |
| 15.93 | 5,6,7,8-Tetramethylbicyclo<br>-[4.1.0]-hept-4-en-3-one                          | C <sub>11</sub> H <sub>16</sub> O               | 164 | 1.58  |
| 16.04 | Carbofurane                                                                     | C <sub>12</sub> H <sub>15</sub> NO <sub>3</sub> | 221 | 0.92  |
| 16.49 | Phenol,<br>3-(1,1-dimethylethyl)<br>4-methoxy-                                  | C <sub>11</sub> H <sub>16</sub> O <sub>2</sub>  | 180 | 5.64  |
| 16.69 | Phenol, 5-methoxy-2,3-dimethyl                                                  | C <sub>9</sub> H <sub>12</sub> O <sub>2</sub>   | 152 | 0.69  |
| 16.79 | 2',4'-Dihydroxy-3'-<br>methylacetophenone                                       | C <sub>9</sub> H <sub>10</sub> O <sub>3</sub>   | 166 | 1.36  |
| 16.94 | Phenol,<br>2-(1,1-dimethylethyl)-3-methyl-                                      | C <sub>11</sub> H <sub>16</sub> O               | 164 | 0.72  |
| 17.20 | 1,4-Benzenediol,<br>2,5-bis(1,1-dimethylethyl)                                  | C <sub>14</sub> H <sub>22</sub> O <sub>2</sub>  | 222 | 0.68  |
| 17.26 | à-Tetralol,<br>2-amino-5,6-dimethoxyl                                           | C <sub>12</sub> H <sub>17</sub> NO <sub>3</sub> | 223 | 0.75  |
| 17.34 | Benzene, 1,4-dimethoxy<br>-2,3,5,6-tetramethyl-                                 | C <sub>12</sub> H <sub>18</sub> O <sub>2</sub>  | 194 | 0.57  |
| 18.26 | Durohydroquinone                                                                | C <sub>10</sub> H <sub>14</sub> O <sub>2</sub>  | 166 | 23.73 |
| 18.54 | Phenol, 2-methoxy-4-<br>methyl-6-[propenyl]-                                    | C <sub>11</sub> H <sub>14</sub> O <sub>2</sub>  | 178 | 1.99  |
| 18.81 | Phenol, 3-(1,1-dimethylethyl)<br>-4-methoxy-                                    | C <sub>11</sub> H <sub>16</sub> O <sub>2</sub>  | 180 | 1.38  |
| 19.04 | 4',6'-Dihydroxy-2',<br>3'-dimethylacetophenone                                  | C <sub>10</sub> H <sub>12</sub> O <sub>3</sub>  | 180 | 5.10  |
| 20.17 | 2-Hydroxy-4,5-methylene<br>dioxypropiophenone                                   | C <sub>10</sub> H <sub>10</sub> O <sub>4</sub>  | 194 | 1.56  |
| 20.60 | 3-Ethyl-4,4-dimethyl-2-<br>(2-methylpropenyl)<br>cyclohex-2-enone               | C <sub>14</sub> H <sub>22</sub> O               | 206 | 0.58  |

|       |                                                          |                   |     |      |
|-------|----------------------------------------------------------|-------------------|-----|------|
| 20.79 | 4,7-Dimethoxy-2-methyl<br>indan-1-one                    | $C_{12}H_{14}O_3$ | 206 | 0.74 |
| 21.36 | Phenol, 2,5-bis<br>(1,1-dimethylethyl)-                  | $C_{14}H_{22}O$   | 206 | 0.92 |
| 22.07 | Trimethyl-3,4-methylene<br>dioxychromane                 | $C_{13}H_{16}O_3$ | 220 | 0.72 |
| 23.04 | 7,9-Ditertbutyl-1-oxaspiro[4,5]-<br>deca-6,9-dien-8-one- | $C_{17}H_{26}O_2$ | 262 | 2.32 |
| 25.62 | 4,6-Dimethoxy-1-naphthaldehyde-                          | $C_{13}H_{12}O_3$ | 216 | 0.66 |
| 35.13 | 9,9'-Bi-9H-fluorene                                      | $C_{26}H_{18}$    | 330 | 8.47 |
